# Supplementary material for: Long-term quality of life in critically ill patients with acute kidney injury treated with renal replacement therapy: a matched cohort study
Source: PubMed Central journal article supplement (PMC4527359; doi:10.1186/s13054-015-1004-8), 2015-08-06
Supplement: 13054_2015_1004_MOESM3_ESM.pdf [file 13054_2015_1004_MOESM3_ESM.pdf]

**Additional File 3:** Variability of the EQ-5D at the different time points: Percentages and 95% confidence intervals (\*) of patients with some or severe problems on the respective dimensions

| <b>47 1-year AKI-RRT patients</b>     |                  |                  |                  |                  |          |
|---------------------------------------|------------------|------------------|------------------|------------------|----------|
|                                       | <b>Baseline</b>  | <b>3 months</b>  | <b>1 year</b>    |                  | <b>P</b> |
| % (95% CI)                            |                  |                  |                  |                  |          |
| Mobility                              | 39.1 (26.4-53.5) | 63.6 (46.6-77.8) | 60.9 (46.5-73.6) |                  | 0.045    |
| Self-care                             | 23.9 (13.9-37.9) | 42.4 (27.2-59.2) | 37.0 (24.5-51.4) |                  | 0.190    |
| Usual activities                      | 37.0 (24.5-51.4) | 81.8 (65.6-91.4) | 60.9 (46.5-73.6) |                  | <0.001   |
| Pain/discomfort                       | 45.7 (32.2-59.8) | 75.8 (59.0-87.2) | 54.3 (40.2-67.8) |                  | 0.013    |
| Anxiety/depression                    | 30.4 (19.1-44.8) | 60.6 (43.7-75.3) | 30.4 (19.1-44.8) |                  | 0.009    |
| <b>94 1-year non AKI-RRT patients</b> |                  |                  |                  |                  |          |
|                                       | <b>Baseline</b>  | <b>3 months</b>  | <b>1 year</b>    |                  | <b>P</b> |
| % (95% CI)                            |                  |                  |                  |                  |          |
| Mobility                              | 37.2 (28.1-47.3) | 54.9 (43.4-66.0) | 55.4 (45.3-65.2) |                  | 0.021    |
| Self-care                             | 24.5 (16.9-34.0) | 40.8 (30.2-52.5) | 38.0 (28.8-48.3) |                  | 0.050    |
| Usual activities                      | 46.8 (37.0-56.8) | 81.7 (71.2-89.0) | 66.3 (56.2-75.1) |                  | <0.001   |
| Pain/discomfort                       | 51.1 (41.1-60.9) | 70.4 (59.0-79.8) | 63.0 (52.8-72.2) |                  | 0.035    |
| Anxiety/depression                    | 40.4 (31.1-50.5) | 39.4 (28.9-51.1) | 41.3 (31.8-51.5) |                  | 0.971    |
| <b>28 4-years AKI-RRT patients</b>    |                  |                  |                  |                  |          |
|                                       | <b>Baseline</b>  | <b>3 months</b>  | <b>1 year</b>    | <b>4 years</b>   | <b>P</b> |
| % (95% CI)                            |                  |                  |                  |                  |          |
| Mobility                              | 25.9 (13.2-44.7) | 61.9 (40.9-79.2) | 59.3 (40.7-75.5) | 50.0 (32.6-67.4) | 0.040    |
| Self-care                             | 14.8 (5.9-32.5)  | 47.6 (28.3-67.6) | 33.3 (18.6-52.2) | 25.9 (13.2-44.7) | 0.090    |
| Usual activities                      | 25.9 (13.2-44.7) | 81.0 (60.0-92.3) | 55.6 (37.3-72.4) | 70.4 (51.5-84.1) | <0.001   |
| Pain/discomfort                       | 48.1 (30.7-66.0) | 71.4 (50.0-86.2) | 59.3 (40.7-75.5) | 55.6 (37.3-72.4) | 0.439    |
| Anxiety/depression                    | 29.6 (15.9-48.5) | 61.9 (40.9-79.2) | 25.9 (13.2-44.7) | 29.6 (15.9-48.5) | 0.040    |

| <b>28 4-years non AKI-RRT patients</b> |                  |                  |                  |                  |          |
|----------------------------------------|------------------|------------------|------------------|------------------|----------|
|                                        | <b>Baseline</b>  | <b>3 months</b>  | <b>1 year</b>    | <b>4 years</b>   | <b>P</b> |
| % (95% CI)                             |                  |                  |                  |                  |          |
| Mobility                               | 18.5 (8.2-36.7)  | 39.1 (22.2-59.2) | 41.7 (24.5-61.2) | 60.7 (42.4-76.4) | 0.017    |
| Self-care                              | 11.1 (3.9-28.1)  | 21.7 (9.7-41.9)  | 25.0 (12.0-44.9) | 28.6 (15.3-47.1) | 0.436    |
| Usual activities                       | 29.6 (15.9-48.5) | 47.8 (29.2-67.0) | 70.8 (50.8-85.1) | 64.3 (45.8-79.3) | 0.014    |
| Pain/discomfort                        | 37.0 (21.5-55.8) | 26.1 (12.5-46.5) | 45.8 (27.9-64.9) | 53.6 (35.8-70.5) | 0.227    |
| Anxiety/depression                     | 51.9 (34.0-69.3) | 17.4 (7.0-37.1)  | 25.0 (12.0-44.9) | 32.1 (17.9-50.7) | 0.054    |

Abbreviations: AKI= acute kidney injury; RRT= renal replacement therapy; CI=confidence interval

(\*) The confidence interval was calculated according to DG Altman, D Machin, TN Bryant, M Gardner (2000). Statistics with confidence: Confidence intervals and statistical guidelines. BMJ Books
