# Supplementary material for: Long-term quality of life in critically ill patients with acute kidney injury treated with renal replacement therapy: a matched cohort study
Source: PubMed Central journal article supplement (PMC4527359; doi:10.1186/s13054-015-1004-8), 2015-08-06
Supplement: 13054_2015_1004_MOESM4_ESM.pdf [file 13054_2015_1004_MOESM4_ESM.pdf]

**Additional File 4:** Variability of the SF-36 norm-based scores at the different time points: median and interquartile ranges

| <b>47 1-year AKI-RRT patients</b>     |                  |                  |                  |          |
|---------------------------------------|------------------|------------------|------------------|----------|
|                                       | <b>Baseline</b>  | <b>3 months</b>  | <b>1 year</b>    | <b>P</b> |
| <i>Median (IQR)</i>                   |                  |                  |                  |          |
| PCS                                   | 41.7 (28.5-54.2) | 30.7 (25.1-40.4) | 38.3 (27.7-47.4) | 0.003    |
| MCS                                   | 53.8 (38.9-61.6) | 39.5 (29.3-47.2) | 53.3 (39.2-58.6) | 0.014    |
| Physical functioning                  | 44.4 (29.1-53.4) | 27.6 (19.2-39.1) | 40.2 (26.5-46.5) | <0.001   |
| Role physical                         | 34.8 (22.6-56.9) | 27.5 (17.7-29.9) | 34.8 (25.0-45.8) | <0.001   |
| Bodily pain                           | 62.1 (37.2-62.1) | 39.7 (29.2-50.9) | 46.5 (37.2-62.1) | 0.015    |
| General health                        | 40.1 (30.5-48.2) | 36.3 (31.1-41.0) | 41.0 (30.5-50.6) | 0.078    |
| Vitality                              | 55.2 (42.7-61.5) | 45.8 (39.6-50.5) | 50.5 (41.9-59.1) | 0.041    |
| Social functioning                    | 51.4 (35.0-56.8) | 35.0 (24.1-40.5) | 45.9 (29.6-56.8) | 0.005    |
| Role emotional                        | 55.9 (40.3-55.9) | 28.7 (20.9-38.4) | 48.1 (32.6-55.9) | <0.001   |
| Mental health                         | 50.0 (33.1-61.3) | 41.6 (30.3-50.0) | 50.0 (40.2-58.4) | 0.022    |
| <b>94 1-year non AKI-RRT patients</b> |                  |                  |                  |          |
|                                       | <b>Baseline</b>  | <b>3 months</b>  | <b>1 year</b>    | <b>P</b> |
| <i>Median (IQR)</i>                   |                  |                  |                  |          |
| PCS                                   | 39.4 (29.1-49.6) | 31.3 (26.3-43.2) | 36.6 (26.0-46.4) | 0.007    |
| MCS                                   | 48.0 (37.5-55.7) | 47.3 (31.6-54.9) | 47.8 (34.8-54.0) | 0.759    |
| Physical functioning                  | 40.2 (23.4-53.4) | 31.8 (21.3-44.4) | 33.9 (22.3-48.6) | 0.001    |
| Role physical                         | 34.8 (22.6-56.9) | 27.5 (17.7-37.3) | 32.4 (23.2-42.2) | 0.059    |
| Bodily pain                           | 46.5 (33.3-62.1) | 39.5 (29.2-50.5) | 41.6 (29.2-55.4) | 0.008    |
| General health                        | 37.7 (30.5-50.6) | 40.1 (31.1-45.8) | 37.7 (30.5-45.8) | 0.871    |
| Vitality                              | 49.0 (36.5-58.3) | 49.0 (39.6-55.2) | 49.0 (36.5-58.3) | 0.896    |
| Social functioning                    | 48.7 (35.0-56.8) | 35.0 (24.1-45.9) | 35.0 (24.1-51.4) | <0.001   |
| Role emotional                        | 55.9 (31.6-55.9) | 38.4 (20.9-55.9) | 44.2 (24.8-55.9) | 0.410    |
| Mental health                         | 47.2 (33.1-58.4) | 50.0 (34.5-55.7) | 47.2 (34.5-55.6) | 0.562    |

| <b>28 4-years AKI-RRT patients</b>     |                  |                  |                  |                  |          |
|----------------------------------------|------------------|------------------|------------------|------------------|----------|
|                                        | <b>Baseline</b>  | <b>3 months</b>  | <b>1 year</b>    | <b>4 years</b>   | <b>P</b> |
| <i>Median (IQR)</i>                    |                  |                  |                  |                  |          |
| PCS                                    | 46.1 (38.7-53.7) | 33.2 (26.0-40.4) | 39.8 (31.6-46.7) | 38.1 (31.6-47.1) | 0.007    |
| MCS                                    | 57.6 (42.8-62.3) | 39.5 (29.3-47.1) | 53.5 (40.9-61.6) | 53.9 (42.4-60.3) | 0.010    |
| Physical functioning                   | 48.6 (36.5-57.0) | 27.6 (18.1-43.4) | 42.3 (29.7-48.6) | 33.9 (29.7-40.2) | <0.001   |
| Role physical                          | 42.2 (27.5-56.9) | 27.5 (17.7-31.8) | 34.8 (27.5-47.1) | 45.9 (27.5-56.9) | <0.001   |
| Bodily pain                            | 51.1 (38.2-62.1) | 41.8 (30.1-50.9) | 51.1 (41.8-62.1) | 50.7 (34.4-62.1) | 0.178    |
| General health                         | 42.9 (30.3-47.9) | 36.3 (32.9-42.9) | 43.4 (36.3-50.6) | 38.2 (32.9-48.0) | 0.093    |
| Vitality                               | 55.2 (43.5-64.6) | 45.8 (42.7-50.5) | 52.1 (45.8-61.5) | 49.0 (45.8-58.3) | 0.037    |
| Social functioning                     | 56.8 (40.5-56.8) | 35.0 (26.9-40.5) | 51.4 (35.0-56.8) | 45.9 (35.0-56.8) | 0.101    |
| Role emotional                         | 55.9 (50.0-55.9) | 24.8 (9.2-38.4)  | 48.1 (32.6-55.9) | 55.9 (20.9-55.9) | 0.001    |
| Mental health                          | 55.6 (33.1-64.1) | 41.6 (33.1-51.4) | 50.0 (41.6-61.3) | 52.8 (41.6-58.5) | 0.188    |
| <b>28 4-years non AKI-RRT patients</b> |                  |                  |                  |                  |          |
|                                        | <b>Baseline</b>  | <b>3 months</b>  | <b>1 year</b>    | <b>4 years</b>   | <b>P</b> |
| <i>Median (IQR)</i>                    |                  |                  |                  |                  |          |
| PCS                                    | 48.4 (36.3-57.0) | 37.1 (26.1-45.5) | 40.8 (27.9-46.5) | 41.0 (32.1-52.6) | 0.358    |
| MCS                                    | 48.6 (34.3-57.6) | 48.9 (37.2-54.8) | 49.7 (40.6-54.7) | 47.0 (37.4-55.5) | 0.913    |
| Physical functioning                   | 52.8 (40.2-54.9) | 39.1 (19.2-44.4) | 38.1 (22.3-48.6) | 38.1 (25.5-48.6) | <0.001   |
| Role physical                          | 52.0 (17.7-56.9) | 27.5 (25.0-39.7) | 32.4 (25.0-39.7) | 39.7 (25.0-47.1) | 0.158    |
| Bodily pain                            | 50.3 (41.2-62.1) | 46.1 (37.2-55.4) | 46.1 (36.1-62.1) | 46.1 (37.2-62.1) | 0.489    |
| General health                         | 41.0 (35.3-55.3) | 40.1 (29.8-49.4) | 41.0 (35.3-48.8) | 41.0 (34.7-53.5) | 0.577    |
| Vitality                               | 52.1 (42.7-58.3) | 49.0 (39.6-58.3) | 52.1 (39.6-58.3) | 49.0 (42.7-55.2) | 0.403    |
| Social functioning                     | 56.8 (35.0-56.8) | 40.5 (24.1-51.4) | 35.0 (22.8-52.8) | 45.9 (24.1-56.8) | 0.058    |
| Role emotional                         | 40.3 (20.9-55.9) | 40.3 (28.7-55.9) | 40.3 (24.8-55.9) | 44.2 (24.8-55.9) | 0.071    |
| Mental health                          | 52.8 (35.9-58.4) | 50.0 (37.3-58.5) | 50.0 (37.3-58.5) | 50.0 (41.6-52.8) | 0.962    |

Abbreviations: AKI= acute kidney injury; RRT= renal replacement therapy; IQR= interquartile range (25%-75%); PCS= physical component score; MCS= mental component score
