# Supplementary material for: Long-term quality of life in critically ill patients with acute kidney injury treated with renal replacement therapy: a matched cohort study
Source: Springer Nature journal article supplement (doi:10.1186/s13054-015-1004-8), 2015-08-06
Supplement: MOESM1 [file 9780620]

**Additional File 1: EQ-5D assessments over time**  
**Percentages of patients with some or severe problems per dimension**

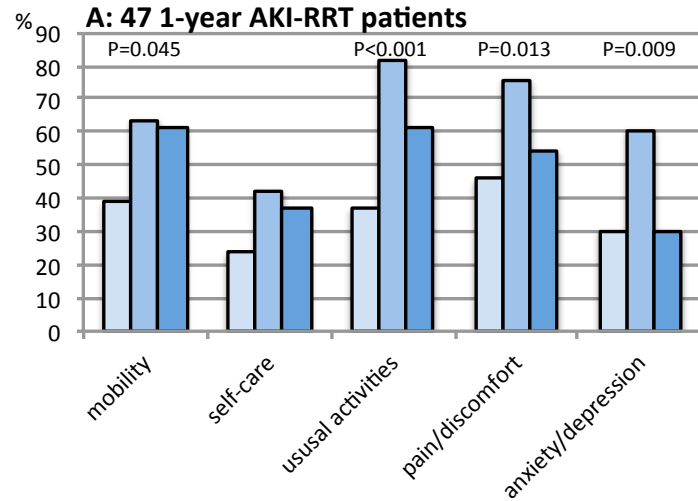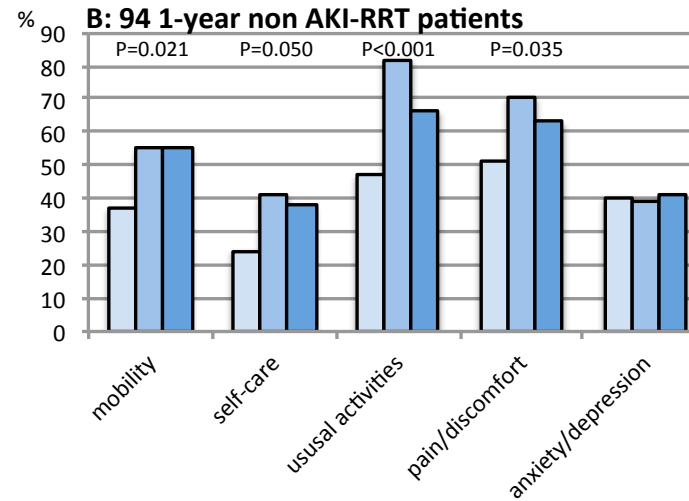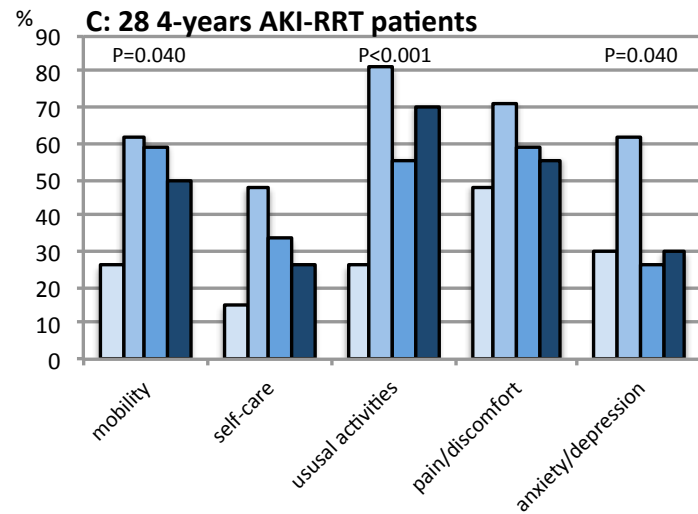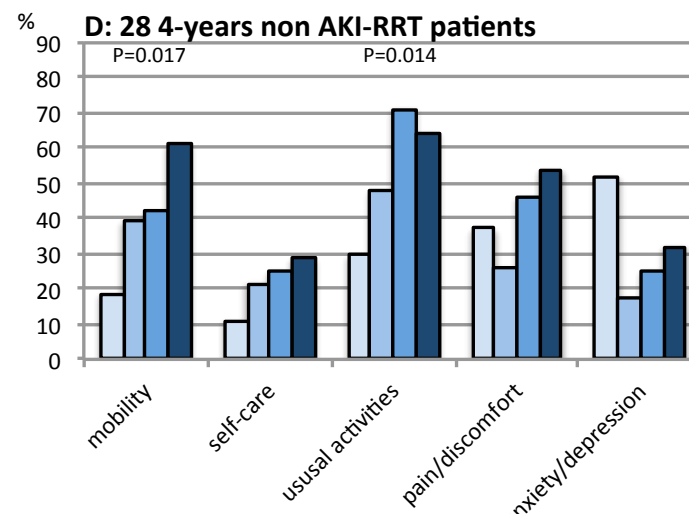

QOL at baseline  
 QOL after 3 months  
 QOL after 1 year  
 QOL after 4 years

**The X-axis represents the different dimensions of the EQ-5D.**

**The Y-axis represents the percentages (%) of patients with some or severe problems in a respective dimension.**

**Only significant P-values (Chi Square test) are shown above the respective dimensions.**

**Abbreviations: QOL= quality of life; AKI= acute kidney injury; RRT= renal replacement therapy**
